# Supplementary material for: The association between immune-related adverse events and the prognosis of solid cancer patients treated with immunotherapy: a systematic review and meta-analysis
Source: PubMed Central journal article supplement — Ther Adv Med Oncol. 2020 Dec 18;12:1758835920980546. doi: 10.1177/1758835920980546 (PMC7758867; doi:10.1177/1758835920980546), 2020-12-18
Supplement: sj-pdf-1-tam-10.1177_1758835920980546.pdf [file sj-pdf-1-tam-10.1177_1758835920980546.pdf]

## Supplemental material

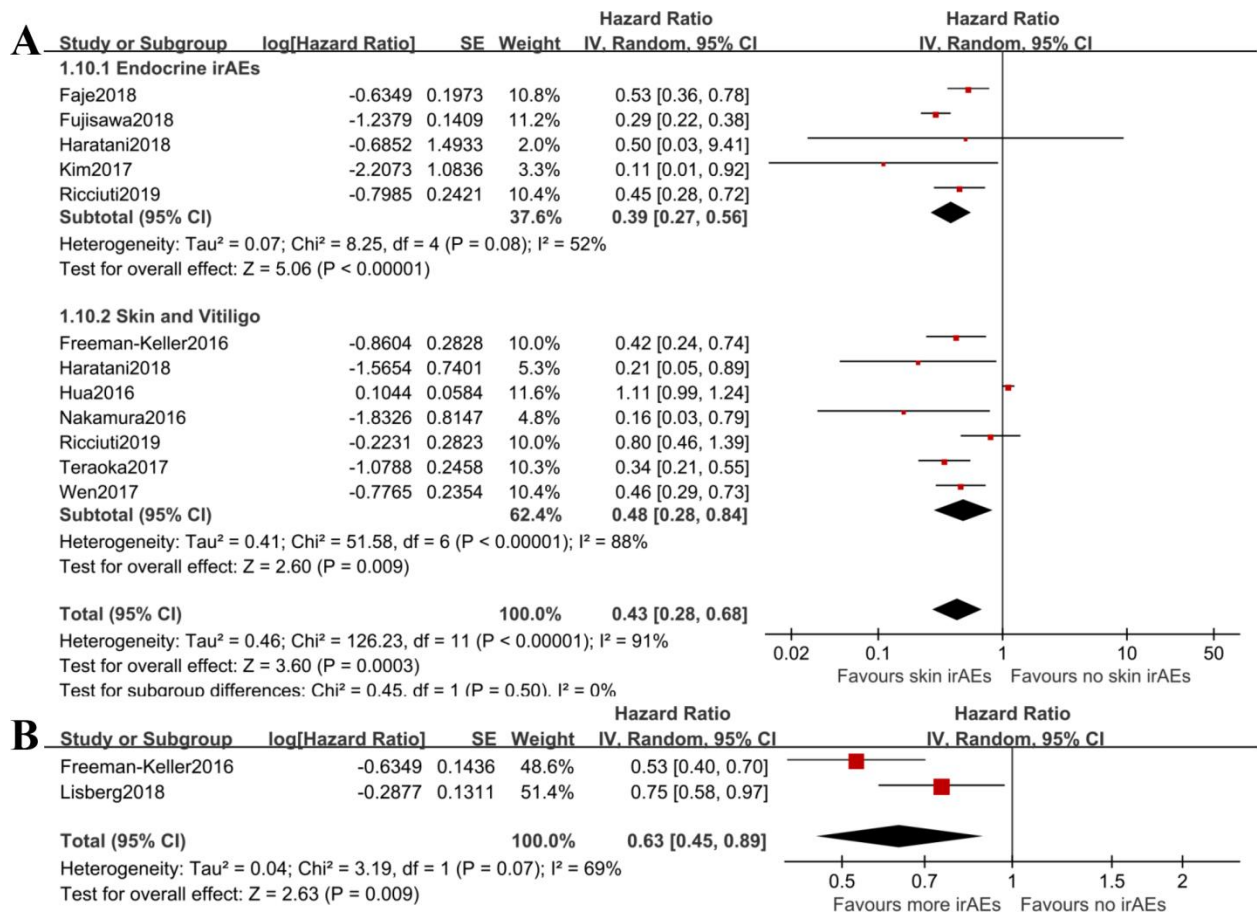

Supplemental Figure 1 The predictive effect of specific irAEs (endocrine irAEs, and skin and vitiligo irAEs) versus no irAEs on OS

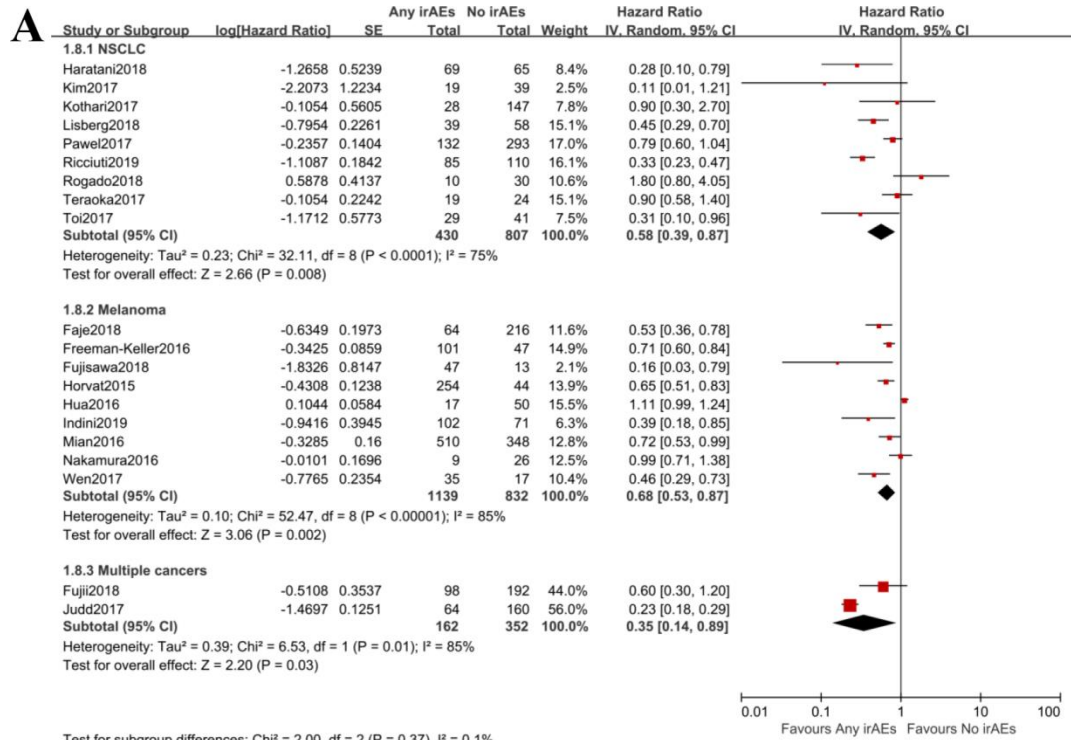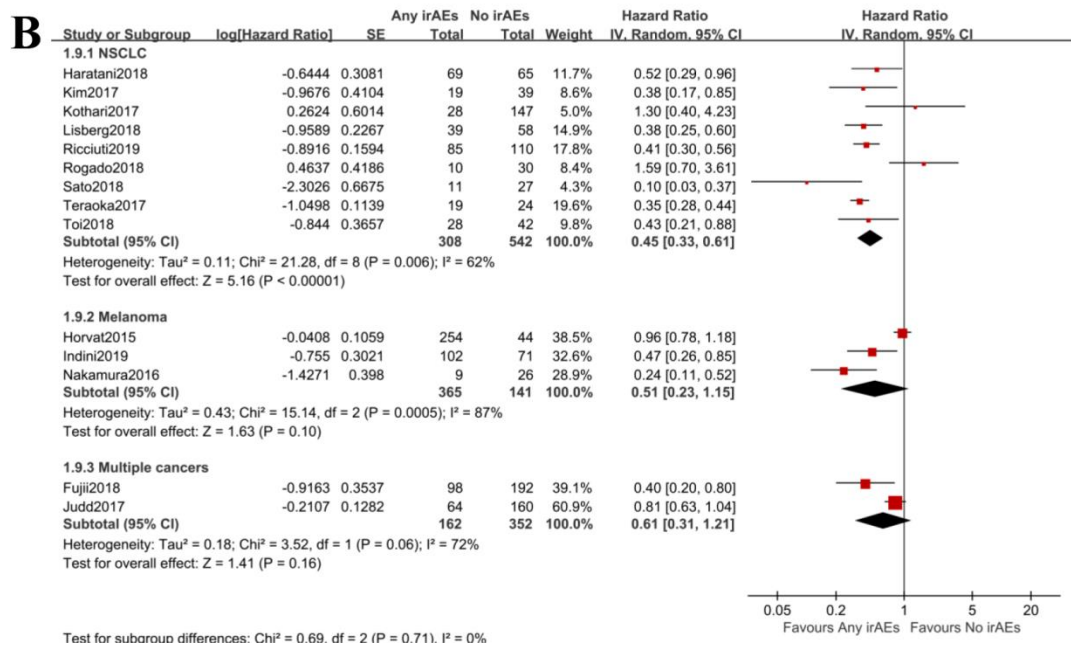

Supplemental Figure 2 Subgroup analysis of OS and PFS with regard to cancer types. A, OS; B, PFS

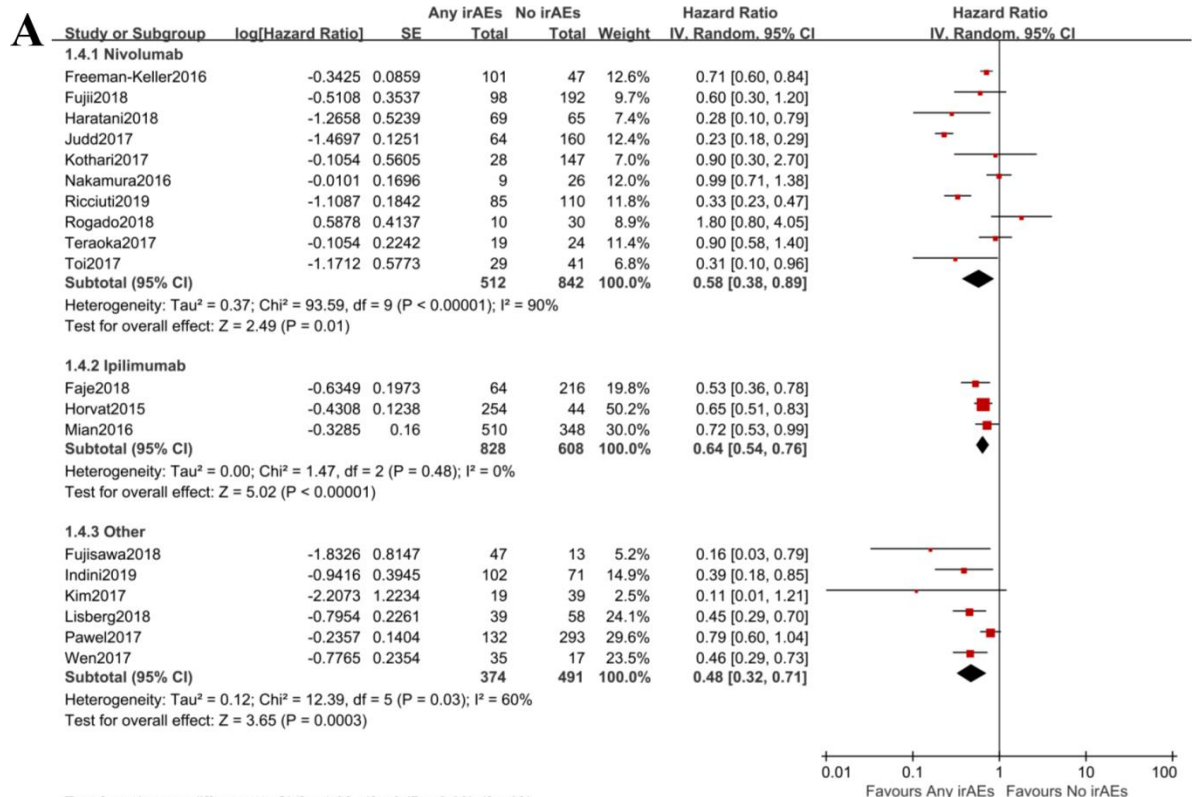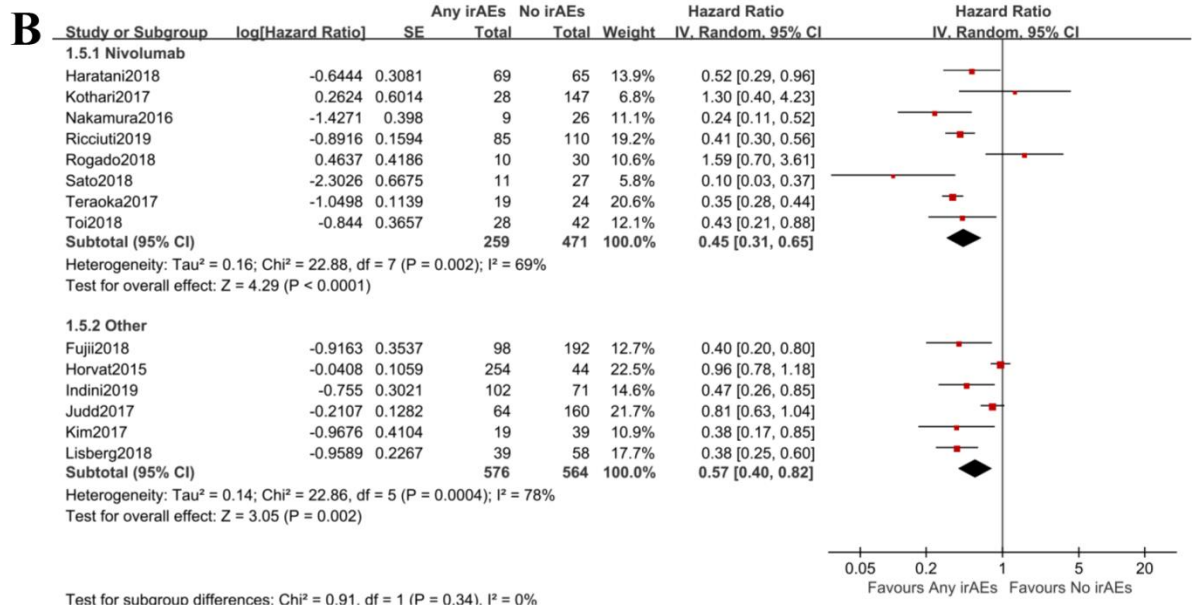

Supplemental Figure 3 Subgroup analysis of OS and PFS with regard to immune checkpoint inhibitors. A, OS; B, PFS

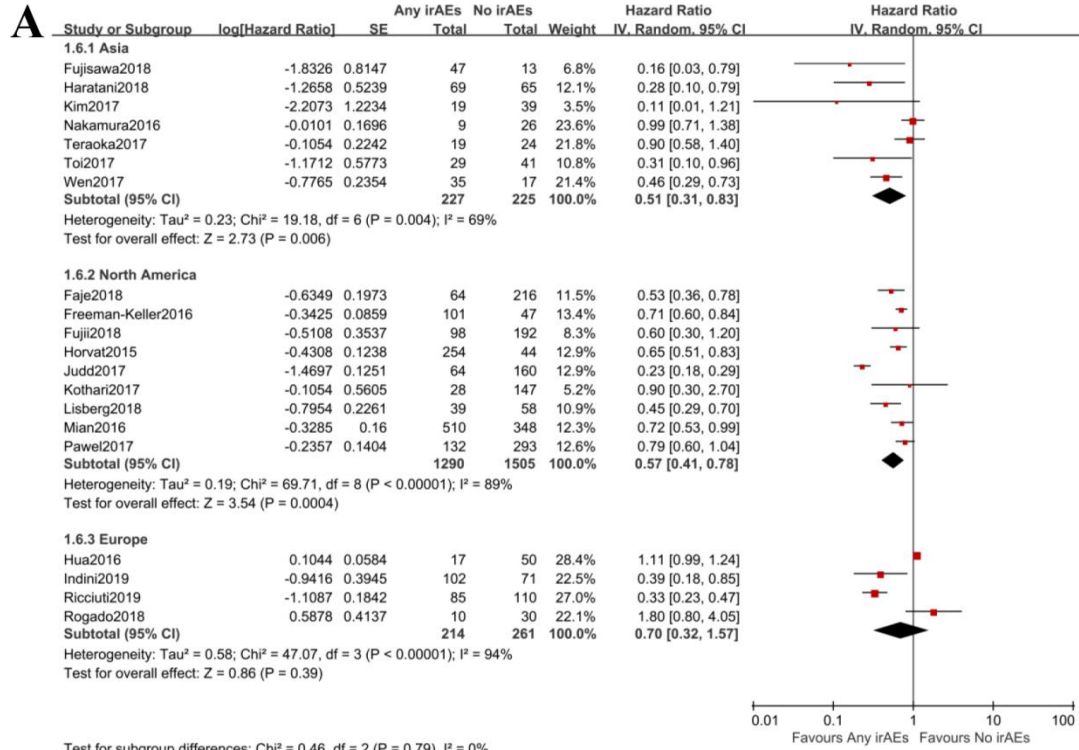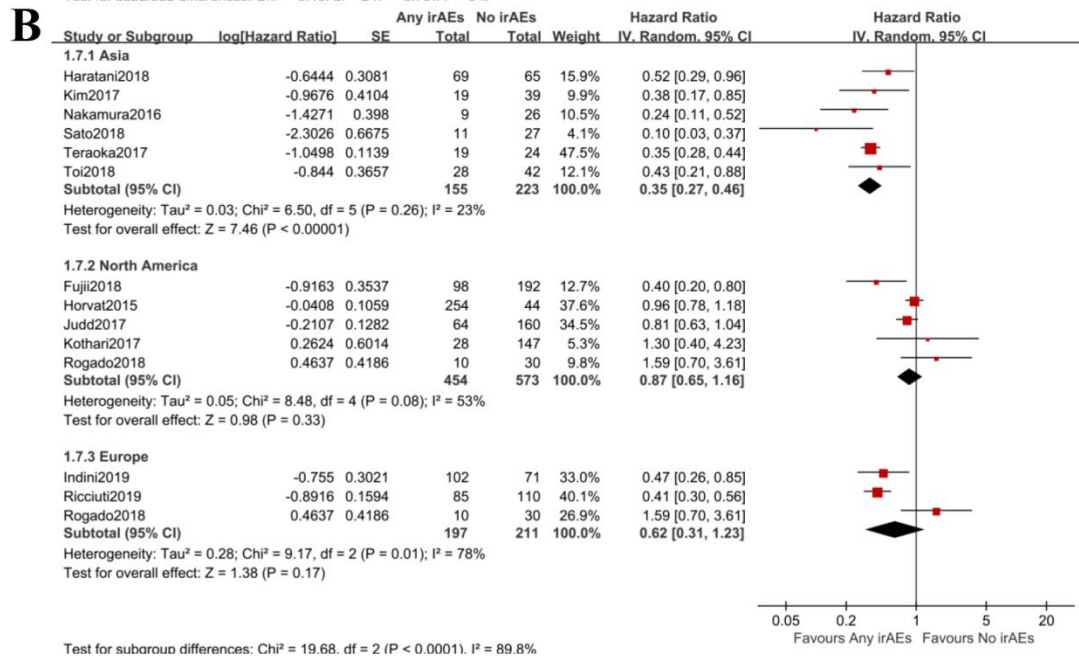

Supplemental Figure 4 Subgroup analysis of overall survival and progression free survival with regard to region. A, OS; B, PFS

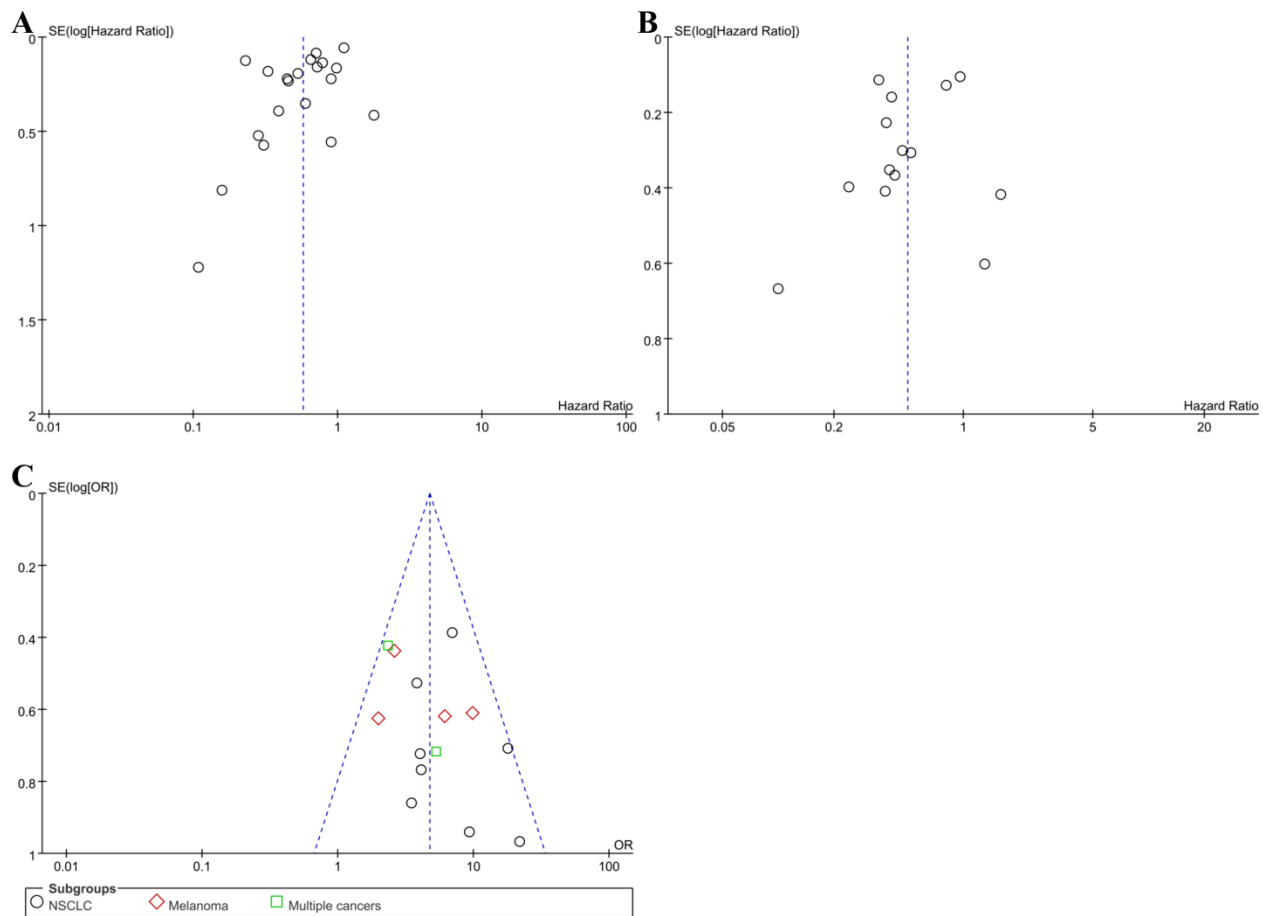

Supplemental Figure 5 Funnel plot for detecting publication bias. A, OS; B, PFS; C, ORR



---

Fields)) OR "immunisers"[All Fields]) OR "immunising"[All Fields]) OR "immunities"[All Fields]) OR "immunity"[MeSH Terms]) OR "immunity"[All Fields]) OR "immunization s"[All Fields]) OR "immunize"[All Fields]) OR "immunized"[All Fields]) OR "immunizer"[All Fields]) OR "immunizers"[All Fields]) OR "immunizes"[All Fields]) OR "immunizing"[All Fields]) OR "vaccin"[Supplementary Concept]) OR "vaccin"[All Fields]) OR "vaccinable"[All Fields]) OR "vaccinal"[All Fields]) OR "vaccinate"[All Fields]) OR "vaccinated"[All Fields]) OR "vaccinates"[All Fields]) OR "vaccinating"[All Fields]) OR "vaccinations"[All Fields]) OR "vaccination s"[All Fields]) OR "vaccinator"[All Fields]) OR "vaccinators"[All Fields]) OR "vaccine s"[All Fields]) OR "vaccined"[All Fields]) OR "vaccines"[MeSH Terms]) OR "vaccines"[All Fields]) OR "vaccine"[All Fields]) OR "vaccins"[All Fields]) AND (((("cell cycle checkpoints"[MeSH Terms] OR ("cell"[All Fields] AND "cycle"[All Fields]) AND "checkpoints"[All Fields])) OR "cell cycle checkpoints"[All Fields]) OR "checkpoint"[All Fields]) OR "checkpoints"[All Fields]) AND (((("blockade"[All Fields] OR "blockaded"[All Fields]) OR "blockades"[All Fields]) OR "blockading"[All Fields])) OR ("PD-1"[All Fields] AND (((("antagonists and inhibitors"[MeSH Subheading] OR ("antagonists"[All Fields] AND "inhibitors"[All Fields])) OR "antagonists and inhibitors"[All Fields]) OR "inhibitors"[All Fields]) OR "inhibitor"[All Fields]) OR "inhibitor s"[All Fields])) OR ("PD-L1"[All Fields] AND (((("antagonists and inhibitors"[MeSH Subheading] OR ("antagonists"[All Fields] AND "inhibitors"[All Fields])) OR "antagonists and inhibitors"[All Fields]) OR "inhibitors"[All Fields]) OR "inhibitor"[All Fields]) OR "inhibitor s"[All Fields])) OR "anti-PD-1"[All Fields]) OR "anti-PD-L1"[All Fields]) OR (("nivolumab"[MeSH Terms] OR "nivolumab"[All Fields]) ) OR ("pembrolizumab"[Supplementary Concept] OR "pembrolizumab"[All Fields]) OR ("atezolizumab"[Supplementary Concept] OR "atezolizumab"[All Fields])) OR ("ipilimumab"[MeSH Terms] OR "ipilimumab"[All Fields])) OR ("durvalumab"[Supplementary Concept] OR "durvalumab"[All Fields])) AND (((("Immune-related"[All Fields] AND (("adverse"[All Fields] OR "adversely"[All Fields]) OR "adverses"[All Fields]) AND ("event"[All Fields] OR "event s"[All Fields]) OR "events"[All Fields])) OR "irAEs"[All Fields]) OR "irAE"[All Fields]) OR (((("immunotherapy"[MeSH

---

---

Terms] OR "immunotherapy"[All Fields] OR "immunotherapies"[All Fields] ) AND  
"treatment-related"[All Fields] AND (("adverse"[All Fields] OR "adversely"[All Fields] OR  
"adverses"[All Fields] AND ("event"[All Fields] OR "event s"[All Fields] OR "events"[All  
Fields)))) AND "3"[All Fields]  
((((((((((((((((((((((((((((((((((((((((("immune"[All Fields] OR "immuned"[All Fields]  
OR "immunes"[All Fields] OR "immunisation"[All Fields] OR "vaccination"[MeSH Terms]  
OR "vaccination"[All Fields] OR "immunization"[All Fields] OR "immunization"[MeSH  
Terms] OR "immunisations"[All Fields] OR "immunizations"[All Fields] OR  
"immunise"[All Fields] OR "immunised"[All Fields] OR "immuniser"[All Fields] OR  
"immunisers"[All Fields] OR "immunising"[All Fields] OR "immunities"[All Fields] OR  
"immunity"[MeSH Terms] OR "immunity"[All Fields] OR "immunization s"[All Fields] OR  
"immunize"[All Fields] OR "immunized"[All Fields] OR "immunizer"[All Fields] OR  
"immunizers"[All Fields] OR "immunizes"[All Fields] OR "immunizing"[All Fields] OR  
"vaccin"[Supplementary Concept] OR "vaccin"[All Fields] OR "vaccinable"[All Fields] OR  
"vaccinal"[All Fields] OR "vaccinate"[All Fields] OR "vaccinated"[All Fields] OR  
"vaccinates"[All Fields] OR "vaccinating"[All Fields] OR "vaccinations"[All Fields] OR  
"vaccination s"[All Fields] OR "vaccinator"[All Fields] OR "vaccinators"[All Fields] OR  
"vaccine s"[All Fields] OR "vaccined"[All Fields] OR "vaccines"[MeSH Terms] OR  
"vaccines"[All Fields] OR "vaccine"[All Fields] OR "vaccins"[All Fields] AND (((("cell  
cycle checkpoints"[MeSH Terms] OR ("cell"[All Fields] AND "cycle"[All Fields] AND  
"checkpoints"[All Fields])) OR "cell cycle checkpoints"[All Fields] OR "checkpoint"[All  
Fields] OR "checkpoints"[All Fields] AND (((("antagonists and inhibitors"[MeSH  
Subheading] OR ("antagonists"[All Fields] AND "inhibitors"[All Fields])) OR "antagonists and  
inhibitors"[All Fields] OR "inhibitors"[All Fields] OR "inhibitor"[All Fields] OR "inhibitor  
s"[All Fields])) OR (((((((((((((((((((((((((((((((((((((((("immune"[All Fields] OR  
"immuned"[All Fields] OR "immunes"[All Fields] OR "immunisation"[All Fields] OR  
"vaccination"[MeSH Terms] OR "vaccination"[All Fields] OR "immunization"[All Fields]  
OR "immunization"[MeSH Terms] OR "immunisations"[All Fields] OR "immunizations"[All

---



---

Fields)) OR "immunise"[All Fields]) OR "immunised"[All Fields]) OR "immuniser"[All Fields]) OR "immunisers"[All Fields]) OR "immunising"[All Fields]) OR "immunities"[All Fields]) OR "immunity"[MeSH Terms]) OR "immunity"[All Fields]) OR "immunization s"[All Fields]) OR "immunize"[All Fields]) OR "immunized"[All Fields]) OR "immunizer"[All Fields]) OR "immunizers"[All Fields]) OR "immunizes"[All Fields]) OR "immunizing"[All Fields]) OR "vaccin"[Supplementary Concept]) OR "vaccin"[All Fields]) OR "vaccinable"[All Fields]) OR "vaccinal"[All Fields]) OR "vaccinate"[All Fields]) OR "vaccinated"[All Fields]) OR "vaccinates"[All Fields]) OR "vaccinating"[All Fields]) OR "vaccinations"[All Fields]) OR "vaccination s"[All Fields]) OR "vaccinator"[All Fields]) OR "vaccinators"[All Fields]) OR "vaccine s"[All Fields]) OR "vaccined"[All Fields]) OR "vaccines"[MeSH Terms]) OR "vaccines"[All Fields]) OR "vaccine"[All Fields]) OR "vaccins"[All Fields]) AND (((("cell cycle checkpoints"[MeSH Terms] OR ("cell"[All Fields] AND "cycle"[All Fields]) AND "checkpoints"[All Fields])) OR "cell cycle checkpoints"[All Fields]) OR "checkpoint"[All Fields]) OR "checkpoints"[All Fields]) AND (((("blockade"[All Fields] OR "blockaded"[All Fields]) OR "blockades"[All Fields]) OR "blockading"[All Fields])) OR ("PD-1"[All Fields] AND (((("antagonists and inhibitors"[MeSH Subheading] OR ("antagonists"[All Fields] AND "inhibitors"[All Fields])) OR "antagonists and inhibitors"[All Fields]) OR "inhibitors"[All Fields]) OR "inhibitor"[All Fields]) OR "inhibitor s"[All Fields])))) OR ("PD-L1"[All Fields] AND (((("antagonists and inhibitors"[MeSH Subheading] OR ("antagonists"[All Fields] AND "inhibitors"[All Fields])) OR "antagonists and inhibitors"[All Fields]) OR "inhibitors"[All Fields]) OR "inhibitor"[All Fields]) OR "inhibitor s"[All Fields])))) OR "anti-PD-1"[All Fields]) OR "anti-PD-L1"[All Fields]) OR ("nivolumab"[MeSH Terms] OR "nivolumab"[All Fields]) ) OR ("pembrolizumab"[Supplementary Concept] OR "pembrolizumab"[All Fields]) OR ("atezolizumab"[Supplementary Concept] OR "atezolizumab"[All Fields]) OR ("ipilimumab"[MeSH Terms] OR "ipilimumab"[All Fields]) OR ("durvalumab"[Supplementary Concept] OR "durvalumab"[All Fields])) AND (((("Immune-related"[All Fields] AND ("adverse"[All Fields] OR "adversely"[All Fields]) OR "adverses"[All Fields]) AND ("event"[All Fields] OR "event s"[All Fields]) OR "events"[All

---

Fields)) OR "irAEs"[All Fields] OR "irAE"[All Fields] OR (((("immunotherapy"[MeSH Terms] OR "immunotherapy"[All Fields] OR "immunotherapies"[All Fields]) ) AND "treatment-related"[All Fields] AND (("adverse"[All Fields] OR "adversely"[All Fields] OR "adverses"[All Fields]) AND (("event"[All Fields] OR "event s"[All Fields] OR "events"[All Fields]))) AND "3"[All Fields])  
 (((((((((((("cancer s"[All Fields] OR "cancerated"[All Fields] OR "canceration"[All Fields] OR "cancerization"[All Fields] OR "cancerized"[All Fields] OR "cancerous"[All Fields] OR "neoplasms"[MeSH Terms] OR "neoplasms"[All Fields] OR "cancer"[All Fields] OR "cancers"[All Fields] OR (((((((((((((((("cysts"[MeSH Terms] OR "cysts"[All Fields] OR "cyst"[All Fields] OR "neoplasm s"[All Fields] OR "neoplasms"[MeSH Terms] OR "neoplasms"[All Fields] OR "neoplasm"[All Fields] OR "neurofibroma"[MeSH Terms] OR "neurofibroma"[All Fields] OR "neurofibromas"[All Fields] OR "tumor s"[All Fields] OR "tumoral"[All Fields] OR "tumorous"[All Fields] OR "tumour"[All Fields] OR "tumor"[All Fields] OR "tumour s"[All Fields] OR "tumoural"[All Fields] OR "tumourous"[All Fields] OR "tumours"[All Fields] OR "tumors"[All Fields])) OR (((("lung neoplasms"[MeSH Terms] OR ("lung"[All Fields] AND "neoplasms"[All Fields])) OR "lung neoplasms"[All Fields] OR ("lung"[All Fields] AND "cancer"[All Fields])) OR "lung cancer"[All Fields])) OR (((("liver neoplasms"[MeSH Terms] OR ("liver"[All Fields] AND "neoplasms"[All Fields])) OR "liver neoplasms"[All Fields] OR ("liver"[All Fields] AND "cancer"[All Fields])) OR "liver cancer"[All Fields])) OR (((("melanoma"[MeSH Terms] OR "melanoma"[All Fields] OR "melanomas"[All Fields] OR "melanoma s"[All Fields])) OR (((("stomach neoplasms"[MeSH Terms] OR ("stomach"[All Fields] AND "neoplasms"[All Fields])) OR "stomach neoplasms"[All Fields] OR ("gastric"[All Fields] AND "cancer"[All Fields])) OR "gastric cancer"[All Fields])) OR (((("oesophageal cancer"[All Fields] OR "esophageal neoplasms"[MeSH Terms] OR ("esophageal"[All Fields] AND "neoplasms"[All Fields])) OR "esophageal neoplasms"[All Fields] OR ("esophageal"[All Fields] AND "cancer"[All Fields])) OR "esophageal cancer"[All Fields])

4,562,067

3 cancer or tumor or lung cancer or liver cancer or melanoma or gastric cancer or esophageal cancer

2 Immune-related adverse events or

(((("Immune-related"[All Fields] AND (("adverse"[All Fields] OR "adversely"[All Fields] OR

2,384

---

irAEs or irAE or immunotherapy  
treatment-related adverse events

"adverses"[All Fields]) AND (("event"[All Fields] OR "event s"[All Fields]) OR "events"[All Fields])) OR "irAEs"[All Fields]) OR "irAE"[All Fields]) OR (((("immunotherapy"[MeSH Terms] OR "immunotherapy"[All Fields]) OR "immunotherapies"[All Fields]) ) AND "treatment-related"[All Fields] AND ("adverse"[All Fields] OR "adversely"[All Fields]) OR "adverses"[All Fields]) AND (("event"[All Fields] OR "event s"[All Fields]) OR "events"[All Fields]))  
((((((((((((((((((((((((((((((((((((((((((((((((((((((((((((((((((((((((((((((((((((((((("immune"[All Fields] OR "immuned"[All Fields]) OR "immunes"[All Fields]) OR "immunisation"[All Fields]) OR "vaccination"[MeSH Terms]) OR "vaccination"[All Fields]) OR "immunization"[All Fields]) OR "immunization"[MeSH Terms]) OR "immunisations"[All Fields]) OR "immunizations"[All Fields]) OR "immunise"[All Fields]) OR "immunised"[All Fields]) OR "immuniser"[All Fields]) OR "immunisers"[All Fields]) OR "immunising"[All Fields]) OR "immunities"[All Fields]) OR "immunity"[MeSH Terms]) OR "immunity"[All Fields]) OR "immunization s"[All Fields]) OR "immunize"[All Fields]) OR "immunized"[All Fields]) OR "immunizer"[All Fields]) OR "immunizers"[All Fields]) OR "immunizes"[All Fields]) OR "immunizing"[All Fields]) OR "vaccin"[Supplementary Concept]) OR "vaccin"[All Fields]) OR "vaccinable"[All Fields]) OR "vaccinal"[All Fields]) OR "vaccinate"[All Fields]) OR "vaccinated"[All Fields]) OR "vaccinates"[All Fields]) OR "vaccinating"[All Fields]) OR "vaccinations"[All Fields]) OR "vaccination s"[All Fields]) OR "vaccinator"[All Fields]) OR "vaccinators"[All Fields]) OR "vaccine s"[All Fields]) OR "vaccined"[All Fields]) OR "vaccines"[MeSH Terms]) OR "vaccines"[All Fields]) OR "vaccine"[All Fields]) OR "vaccins"[All Fields]) AND (((("cell cycle checkpoints"[MeSH Terms] OR ("cell"[All Fields] AND "cycle"[All Fields]) AND "checkpoints"[All Fields])) OR "cell cycle checkpoints"[All Fields]) OR "checkpoint"[All Fields]) OR "checkpoints"[All Fields]) AND (((("antagonists and inhibitors"[MeSH Subheading] OR ("antagonists"[All Fields] AND "inhibitors"[All Fields])) OR "antagonists and inhibitors"[All Fields]) OR "inhibitors"[All Fields]) OR "inhibitor"[All Fields]) OR "inhibitor s"[All Fields])) OR (((((((((((((((((((((((((((((((((((((((((((((((((((((((((((((((((((((((((((((((((((((((("immune"[All Fields] OR "immuned"[All Fields]) OR "immunes"[All Fields]) OR "immunisation"[All Fields]) OR

immune checkpoint inhibitor or  
immune checkpoint blockade or PD-1  
inhibitor or PD-L1 inhibitor or  
1 anti-PD-1 or anti-PD-L1 or nivolumab  
or pembrolizumab or atezolizumab or  
ipilimumab or durvalumab

---

"vaccination"[MeSH Terms]) OR "vaccination"[All Fields]) OR "immunization"[All Fields])  
OR "immunization"[MeSH Terms]) OR "immunisations"[All Fields]) OR "immunizations"[All  
Fields]) OR "immunise"[All Fields]) OR "immunised"[All Fields]) OR "immuniser"[All  
Fields]) OR "immunisers"[All Fields]) OR "immunising"[All Fields]) OR "immunities"[All  
Fields]) OR "immunity"[MeSH Terms]) OR "immunity"[All Fields]) OR "immunization s"[All  
Fields]) OR "immunize"[All Fields]) OR "immunized"[All Fields]) OR "immunizer"[All  
Fields]) OR "immunizers"[All Fields]) OR "immunizes"[All Fields]) OR "immunizing"[All  
Fields]) OR "vaccin"[Supplementary Concept]) OR "vaccin"[All Fields]) OR "vaccinable"[All  
Fields]) OR "vaccinal"[All Fields]) OR "vaccinate"[All Fields]) OR "vaccinated"[All Fields])  
OR "vaccinates"[All Fields]) OR "vaccinating"[All Fields]) OR "vaccinations"[All Fields]) OR  
"vaccination s"[All Fields]) OR "vaccinator"[All Fields]) OR "vaccinators"[All Fields]) OR  
"vaccine s"[All Fields]) OR "vaccined"[All Fields]) OR "vaccines"[MeSH Terms]) OR  
"vaccines"[All Fields]) OR "vaccine"[All Fields]) OR "vaccins"[All Fields]) AND (((("cell  
cycle checkpoints"[MeSH Terms] OR ("cell"[All Fields] AND "cycle"[All Fields]) AND  
"checkpoints"[All Fields])) OR "cell cycle checkpoints"[All Fields]) OR "checkpoint"[All  
Fields]) OR "checkpoints"[All Fields]) AND (((("blockade"[All Fields] OR "blockaded"[All  
Fields]) OR "blockades"[All Fields]) OR "blockading"[All Fields])) OR ("PD-1"[All Fields]  
AND (((("antagonists and inhibitors"[MeSH Subheading] OR ("antagonists"[All Fields] AND  
"inhibitors"[All Fields])) OR "antagonists and inhibitors"[All Fields]) OR "inhibitors"[All  
Fields]) OR "inhibitor"[All Fields]) OR "inhibitor s"[All Fields])) OR ("PD-L1"[All Fields]  
AND (((("antagonists and inhibitors"[MeSH Subheading] OR ("antagonists"[All Fields] AND  
"inhibitors"[All Fields])) OR "antagonists and inhibitors"[All Fields]) OR "inhibitors"[All  
Fields]) OR "inhibitor"[All Fields]) OR "inhibitor s"[All Fields])) OR "anti-PD-1"[All Fields])  
OR "anti-PD-L1"[All Fields]) OR ("nivolumab"[MeSH Terms] OR "nivolumab"[All  
Fields]) ) OR ("pembrolizumab"[Supplementary Concept] OR "pembrolizumab"[All Fields])  
OR ("atezolizumab"[Supplementary Concept] OR "atezolizumab"[All Fields]) OR  
("ipilimumab"[MeSH Terms] OR "ipilimumab"[All Fields]) OR  
("durvalumab"[Supplementary Concept] OR "durvalumab"[All Fields])

---

Supplemental Table 2 PRISMA 2009 Checklist

| Section/topic             | # | Checklist item                                                                                                                                                                                                                                                                                              | Reported on page # |
|---------------------------|---|-------------------------------------------------------------------------------------------------------------------------------------------------------------------------------------------------------------------------------------------------------------------------------------------------------------|--------------------|
| <b>TITLE</b>              |   |                                                                                                                                                                                                                                                                                                             |                    |
| Title                     | 1 | Identify the report as a systematic review, meta-analysis, or both.                                                                                                                                                                                                                                         | 1                  |
| <b>ABSTRACT</b>           |   |                                                                                                                                                                                                                                                                                                             |                    |
| Structured summary        | 2 | Provide a structured summary including, as applicable: background; objectives; data sources; study eligibility criteria, participants, and interventions; study appraisal and synthesis methods; results; limitations; conclusions and implications of key findings; systematic review registration number. | 2                  |
| <b>INTRODUCTION</b>       |   |                                                                                                                                                                                                                                                                                                             |                    |
| Rationale                 | 3 | Describe the rationale for the review in the context of what is already known.                                                                                                                                                                                                                              | 3                  |
| Objectives                | 4 | Provide an explicit statement of questions being addressed with reference to participants, interventions, comparisons, outcomes, and study design (PICOS).                                                                                                                                                  | 3                  |
| <b>METHODS</b>            |   |                                                                                                                                                                                                                                                                                                             |                    |
| Protocol and registration | 5 | Indicate if a review protocol exists, if and where it can be accessed (e.g., Web address), and, if available, provide registration information including registration number.                                                                                                                               | 3                  |
| Eligibility criteria      | 6 | Specify study characteristics (e.g., PICOS, length of follow-up) and report characteristics (e.g., years considered, language, publication status) used as criteria for eligibility, giving rationale.                                                                                                      | 3-4                |
| Information sources       | 7 | Describe all information sources (e.g., databases with dates of coverage, contact with study authors to identify additional studies) in the search and date last searched.                                                                                                                                  | 3-4                |
| Search                    | 8 | Present full electronic search strategy for at least one database, including any limits used, such that it could be repeated.                                                                                                                                                                               | 3                  |

|                                    |    |                                                                                                                                                                                                                        |     |
|------------------------------------|----|------------------------------------------------------------------------------------------------------------------------------------------------------------------------------------------------------------------------|-----|
| Study selection                    | 9  | State the process for selecting studies (i.e., screening, eligibility, included in systematic review, and, if applicable, included in the meta-analysis).                                                              | 4   |
| Data collection process            | 10 | Describe method of data extraction from reports (e.g., piloted forms, independently, in duplicate) and any processes for obtaining and confirming data from investigators.                                             | 4   |
| Data items                         | 11 | List and define all variables for which data were sought (e.g., PICOS, funding sources) and any assumptions and simplifications made.                                                                                  | 4   |
| Risk of bias in individual studies | 12 | Describe methods used for assessing risk of bias of individual studies (including specification of whether this was done at the study or outcome level), and how this information is to be used in any data synthesis. | 4   |
| Summary measures                   | 13 | State the principal summary measures (e.g., risk ratio, difference in means).                                                                                                                                          | 4-5 |
| Synthesis of results               | 14 | Describe the methods of handling data and combining results of studies, if done, including measures of consistency (e.g., $I^2$ ) for each meta-analysis.                                                              | 4-5 |
| Risk of bias across studies        | 15 | Specify any assessment of risk of bias that may affect the cumulative evidence (e.g., publication bias, selective reporting within studies).                                                                           | 5   |
| Additional analyses                | 16 | Describe methods of additional analyses (e.g., sensitivity or subgroup analyses, meta-regression), if done, indicating which were pre-specified.                                                                       | 5   |
| <b>RESULTS</b>                     |    |                                                                                                                                                                                                                        |     |
| Study selection                    | 17 | Give numbers of studies screened, assessed for eligibility, and included in the review, with reasons for exclusions at each stage, ideally with a flow diagram.                                                        | 5   |
| Study characteristics              | 18 | For each study, present characteristics for which data were extracted (e.g., study size, PICOS, follow-up period) and provide the citations.                                                                           | 5-6 |
| Risk of bias within studies        | 19 | Present data on risk of bias of each study and, if available, any outcome level assessment (see item 12).                                                                                                              | 6   |
| Results of individual studies      | 20 | For all outcomes considered (benefits or harms), present, for each study: (a) simple summary data for each intervention group (b) effect estimates and confidence intervals, ideally with a forest plot.               | 6-9 |
| Synthesis of results               | 21 | Present results of each meta-analysis done, including confidence intervals and measures of consistency.                                                                                                                | 6-9 |

|                             |    |                                                                                                                                                                                      |      |
|-----------------------------|----|--------------------------------------------------------------------------------------------------------------------------------------------------------------------------------------|------|
| Risk of bias across studies | 22 | Present results of any assessment of risk of bias across studies (see Item 15).                                                                                                      | 6-9  |
| Additional analysis         | 23 | Give results of additional analyses, if done (e.g., sensitivity or subgroup analyses, meta-regression [see Item 16]).                                                                | 9    |
| <b>DISCUSSION</b>           |    |                                                                                                                                                                                      |      |
| Summary of evidence         | 24 | Summarize the main findings including the strength of evidence for each main outcome; consider their relevance to key groups (e.g., healthcare providers, users, and policy makers). | 9-10 |
| Limitations                 | 25 | Discuss limitations at study and outcome level (e.g., risk of bias), and at review-level (e.g., incomplete retrieval of identified research, reporting bias).                        | 11   |
| Conclusions                 | 26 | Provide a general interpretation of the results in the context of other evidence, and implications for future research.                                                              | 12   |
| <b>FUNDING</b>              |    |                                                                                                                                                                                      |      |
| Funding                     | 27 | Describe sources of funding for the systematic review and other support (e.g., supply of data); role of funders for the systematic review.                                           | 12   |

*From:* Moher D, Liberati A, Tetzlaff J, Altman DG, The PRISMA Group (2009). Preferred Reporting Items for Systematic Reviews and Meta-Analyses: The PRISMA Statement. PLoS Med 6(6): e1000097. doi:10.1371/journal.pmed1000097
